# Supplementary material for: Effects of aerobic exercise on cognition and hippocampal volume in Alzheimer’s disease: study protocol of a randomized controlled trial (The FIT-AD trial)
Source: PubMed Central journal article supplement (PMC4283145; doi:10.1186/1745-6215-15-394), 2014-10-11

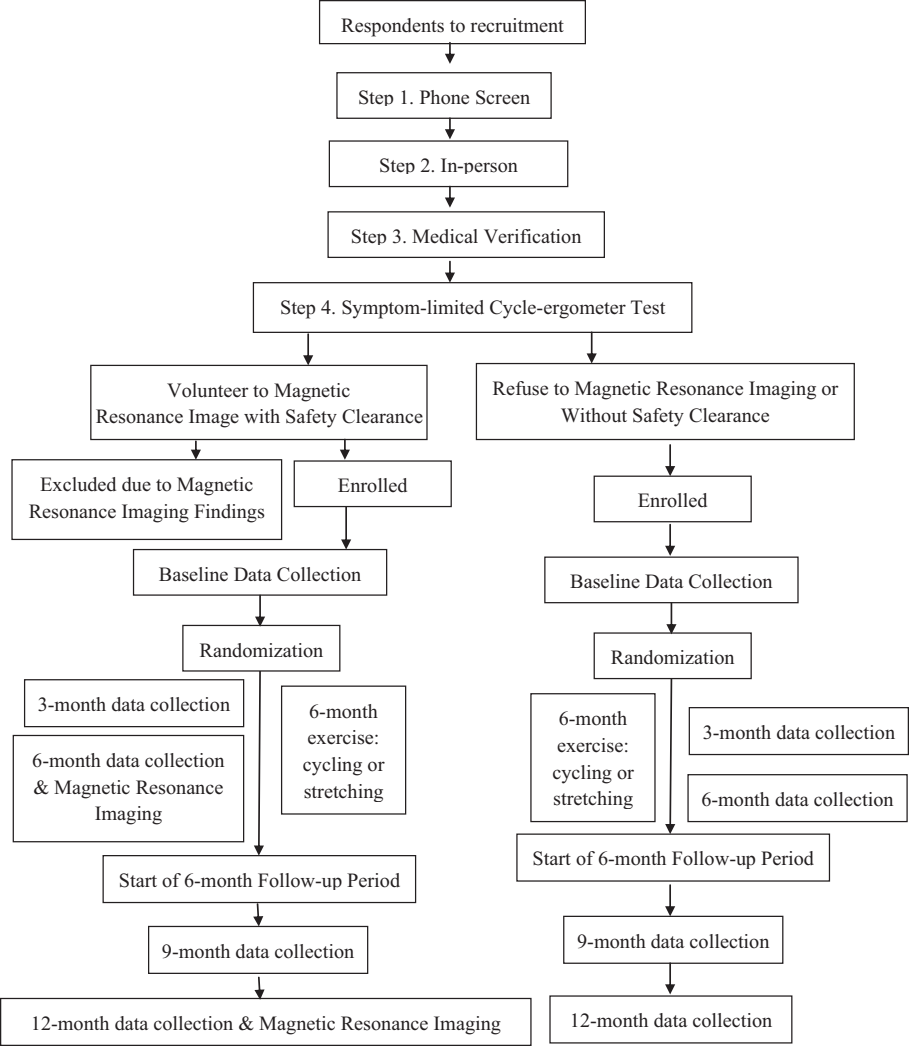

Supplement: 13063_2014_2344_MOESM2_ESM.pdf [file 13063_2014_2344_MOESM2_ESM.pdf]
